# Supplementary material for: Comprehensive analysis of the role of a four-gene signature based on EMT in the prognosis, immunity, and treatment of lung squamous cell carcinoma
Source: publisher site journal article supplement (doi:10.18632/aging.204878), 2023-07-17
Supplement: Supplementary file [file aging-v15i14-204878-supplementary-material-SD1.pdf]

SUPPLEMENTARY FIGURES

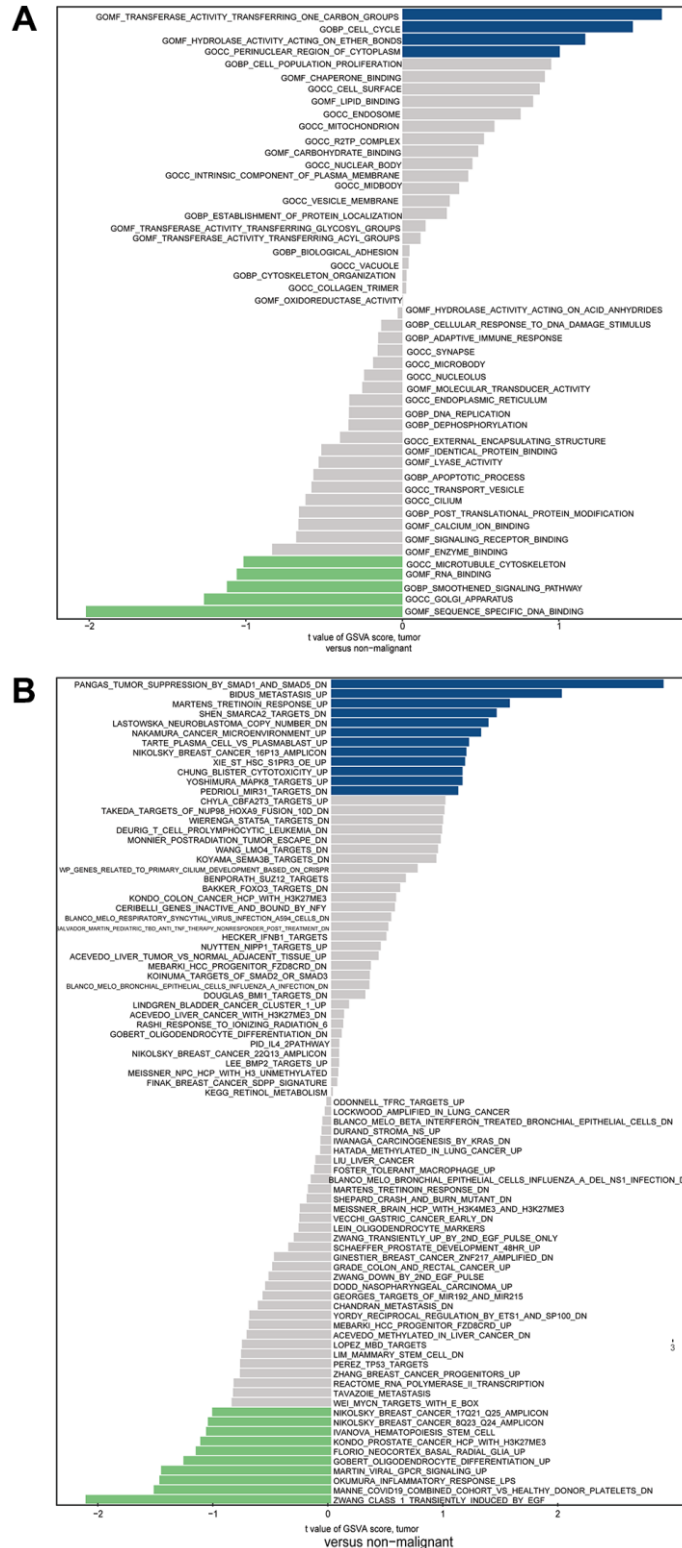

Supplementary Figure 1. A barplot depicting the GO enrichment (A) analysis and GSEA analysis of KEGG (B). The blue bands indicate a positive correlation, whereas the green bands indicate a negative correlation.

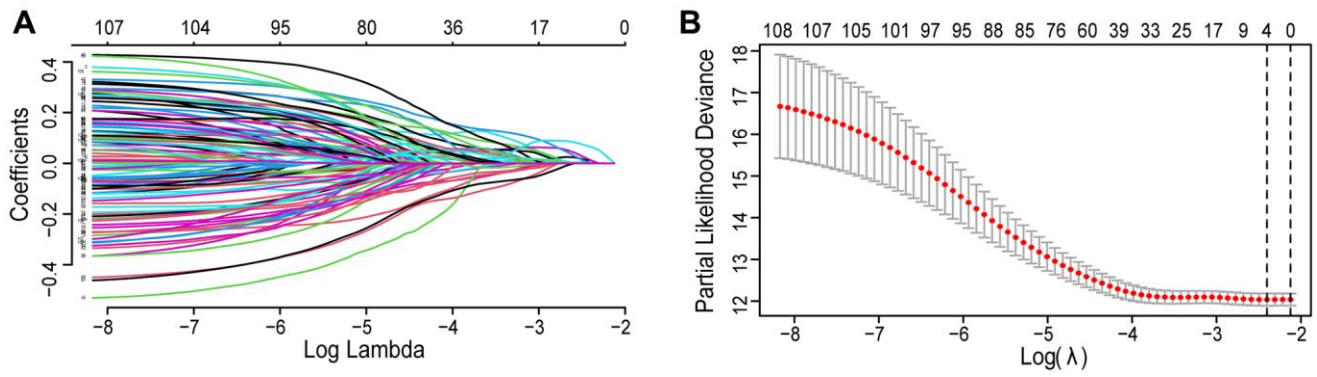

**Supplementary Figure 2. Establishment of a prognostic model using LASSO regression analysis.** (A) LASSO coefficient profiles for 108 EMT-RDGs. Each curve corresponds to a single gene. (B) Optimal parameter (lambda) selection in the LASSO model.

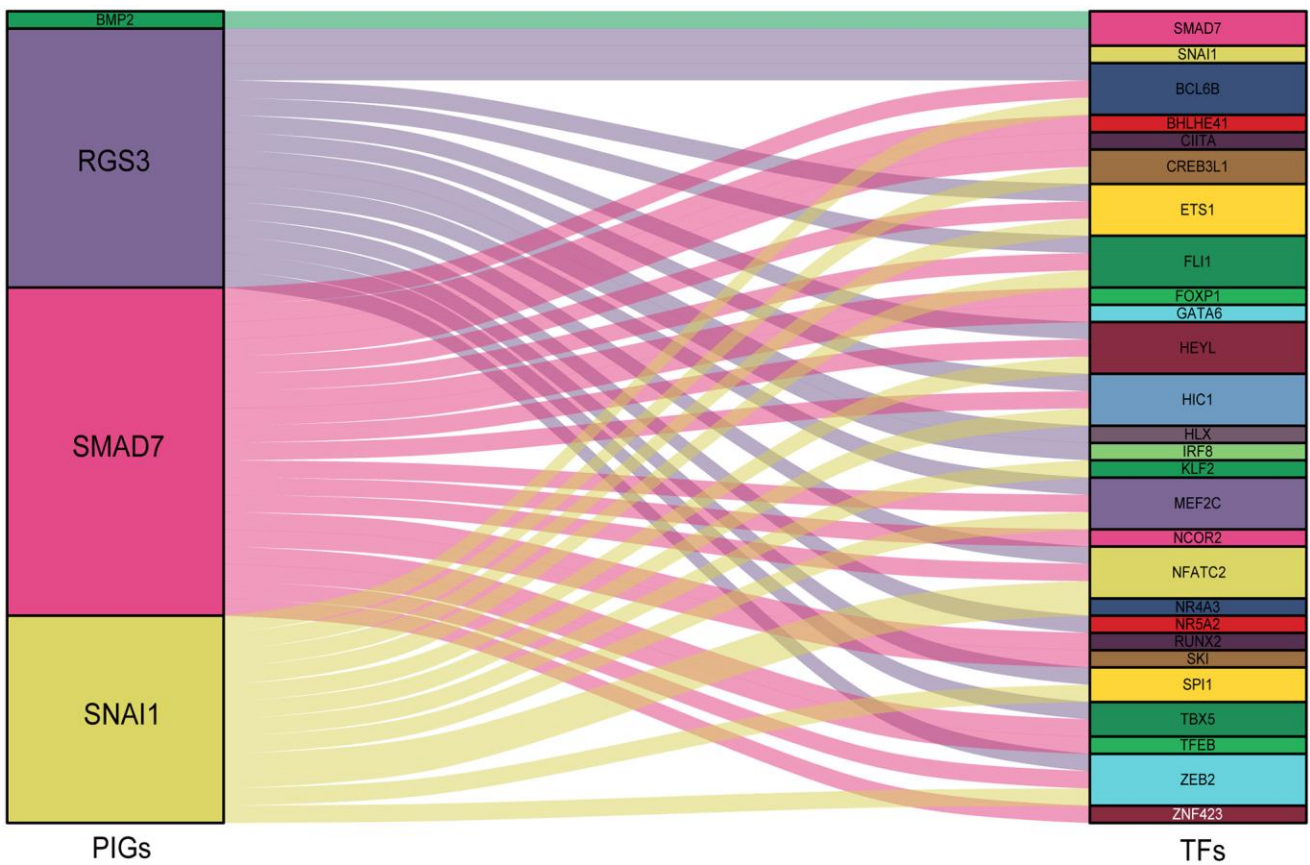

**Supplementary Figure 3. Sankey diagram.** The correlation between TFs and EMT-RDGs.

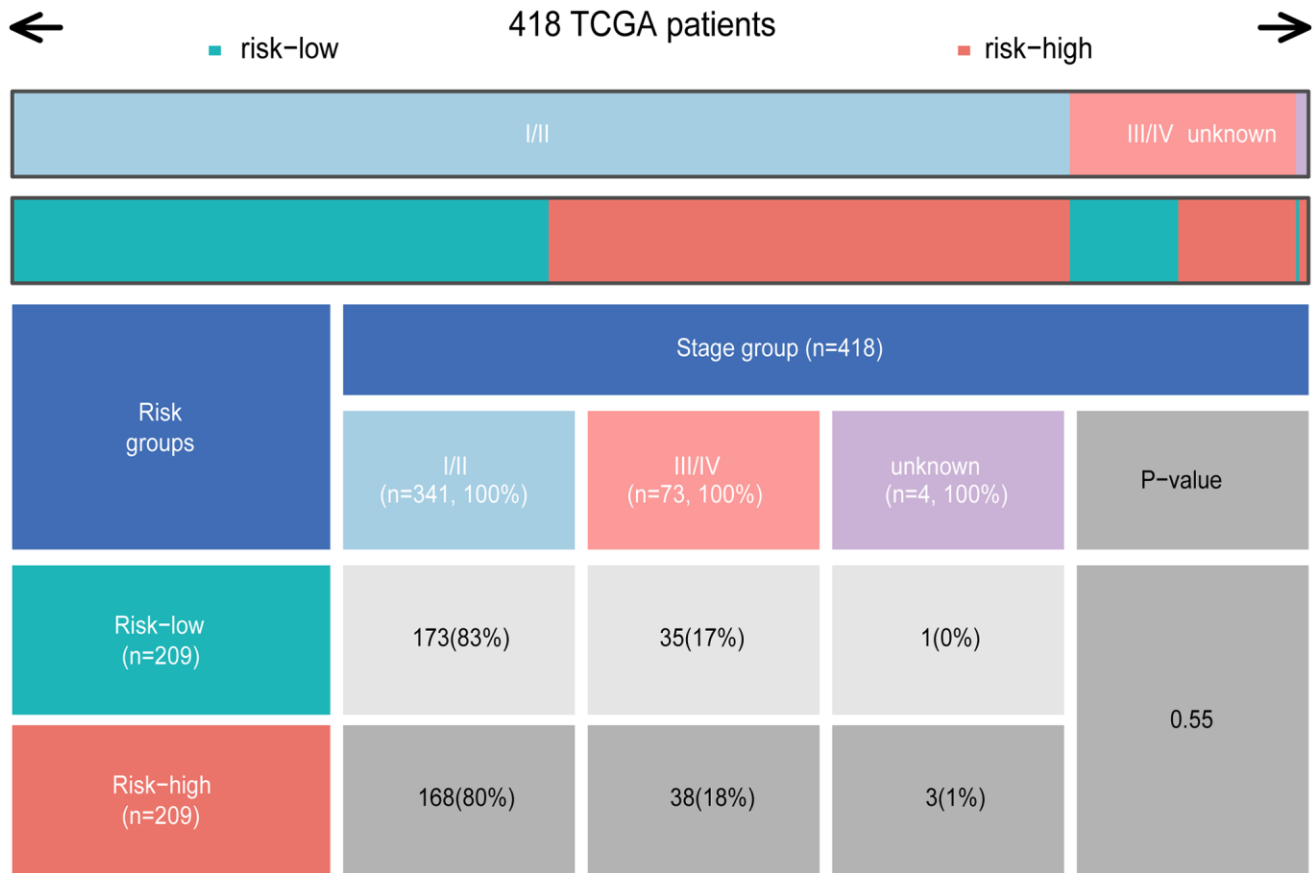

**Supplementary Figure 4. The clinicopathological characteristics of the high- and low-risk groups.**

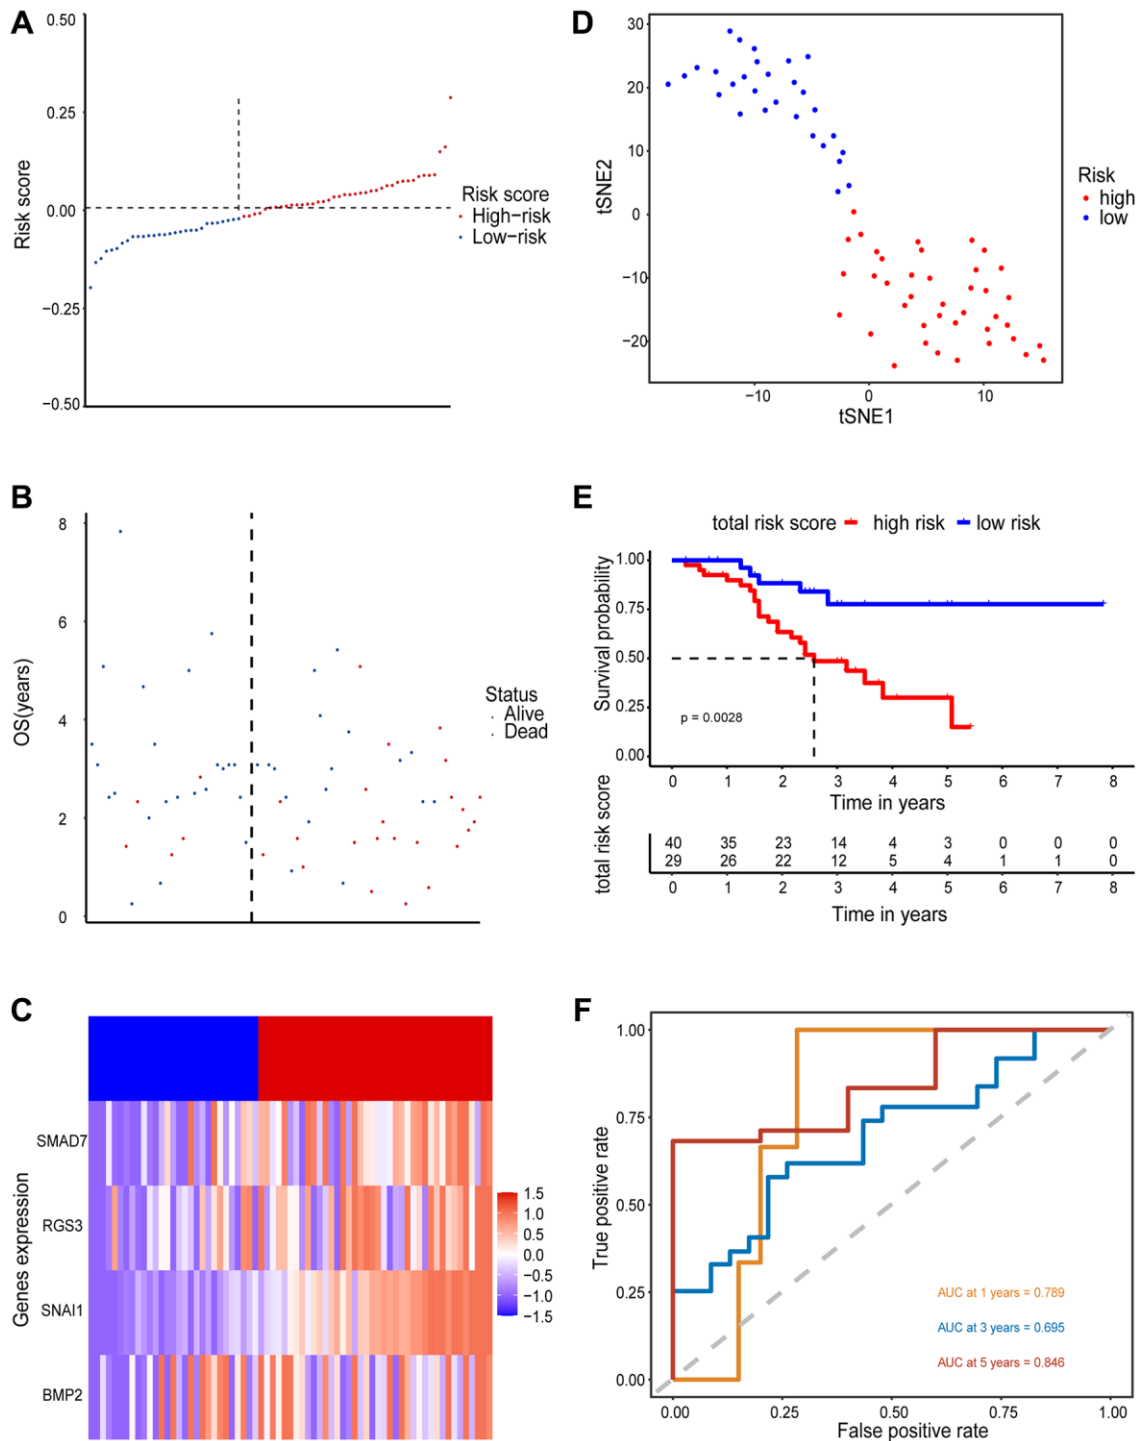

**Supplementary Figure 5. Prognostic value of 4 EMT-RDGs in the validation set.** (A) A risk curve based on the risk score of each sample. (B) A scatter plot showing the survival status of each sample. (C) A heatmap of 4 EMT-RDGs. (D) t-SNE plot of high-and low-risk groups based on the four-gene prognostic model. (E) Kaplan-Meier survival curve analysis. (F) ROC curves for the 1, 3, and 5-year survival prediction.

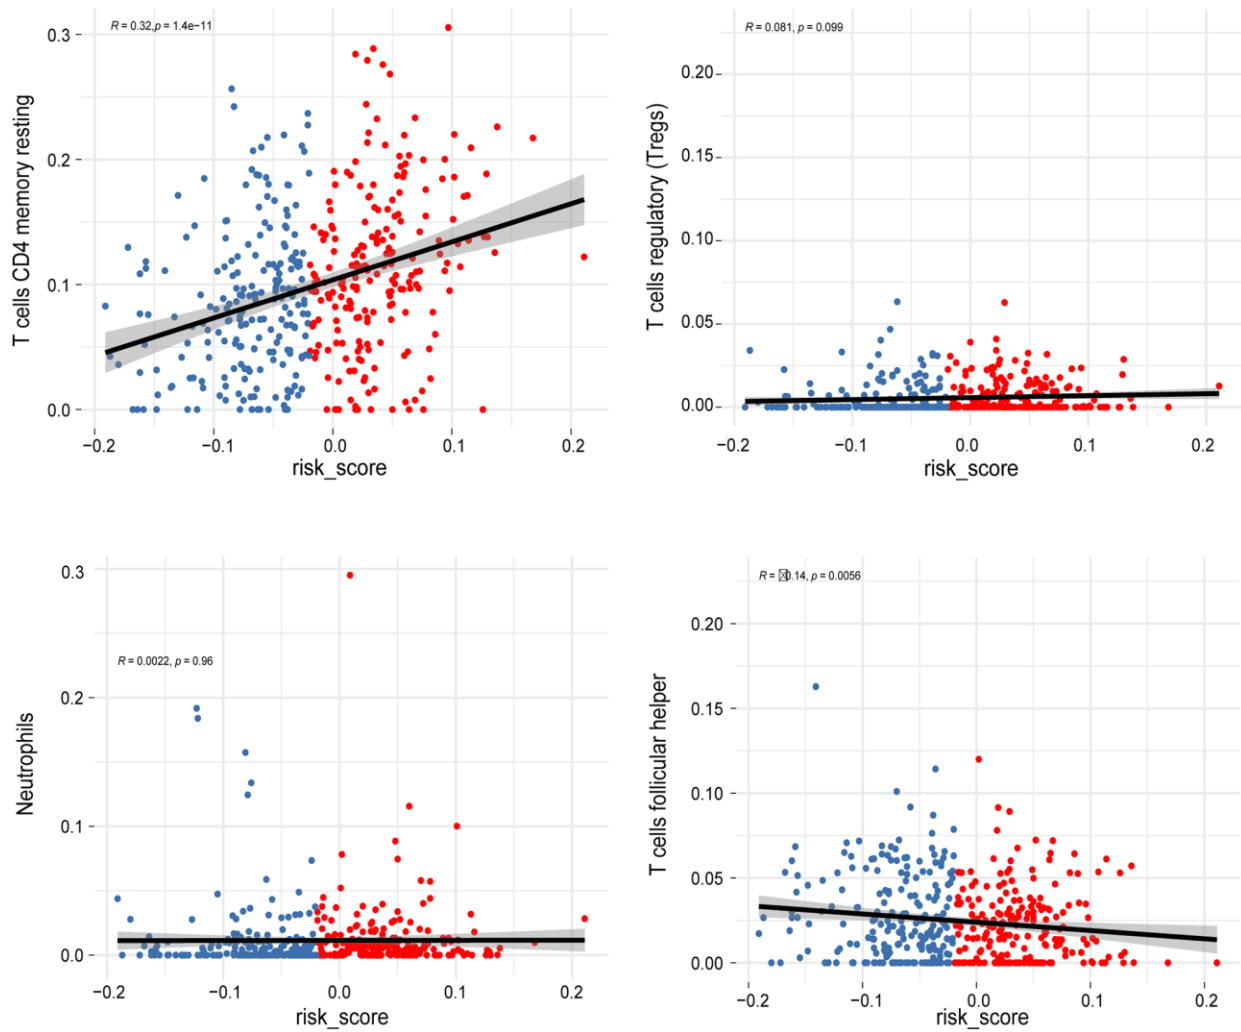

Supplementary Figure 6. The statistically significant relationships between risk score and level of immune cell infiltration.

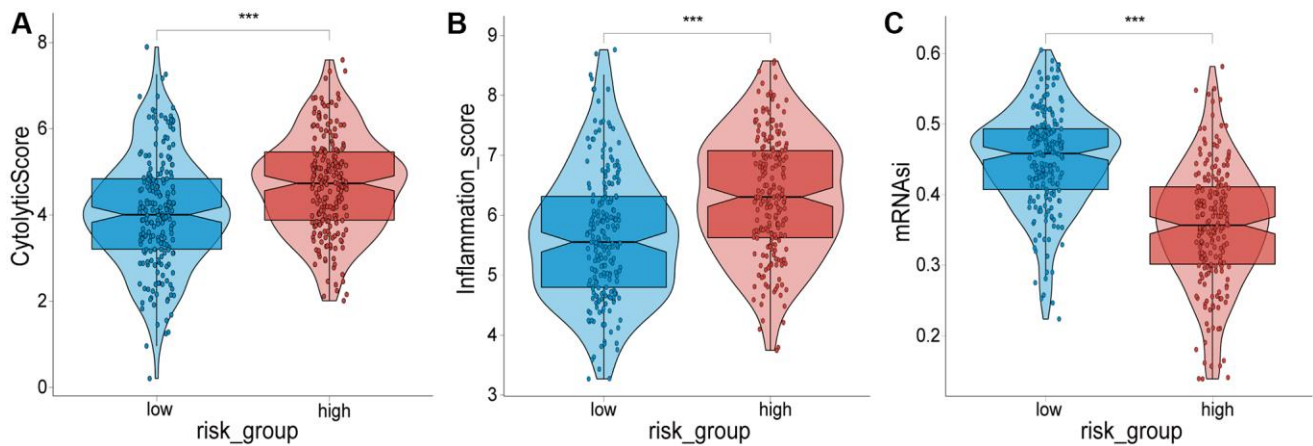

Supplementary Figure 7. Differential analysis of cytolytic activity scores, T cell inflammation scores, and mRNAsi indexes between the high- and low-risk groups. (A) Difference in cytolytic activity scores between the high- and low-risk groups. (B) Differences in T cell inflammation scores between the high- and low-risk groups. (C) Difference in mRNAsi indexes between the high- and low-risk groups.

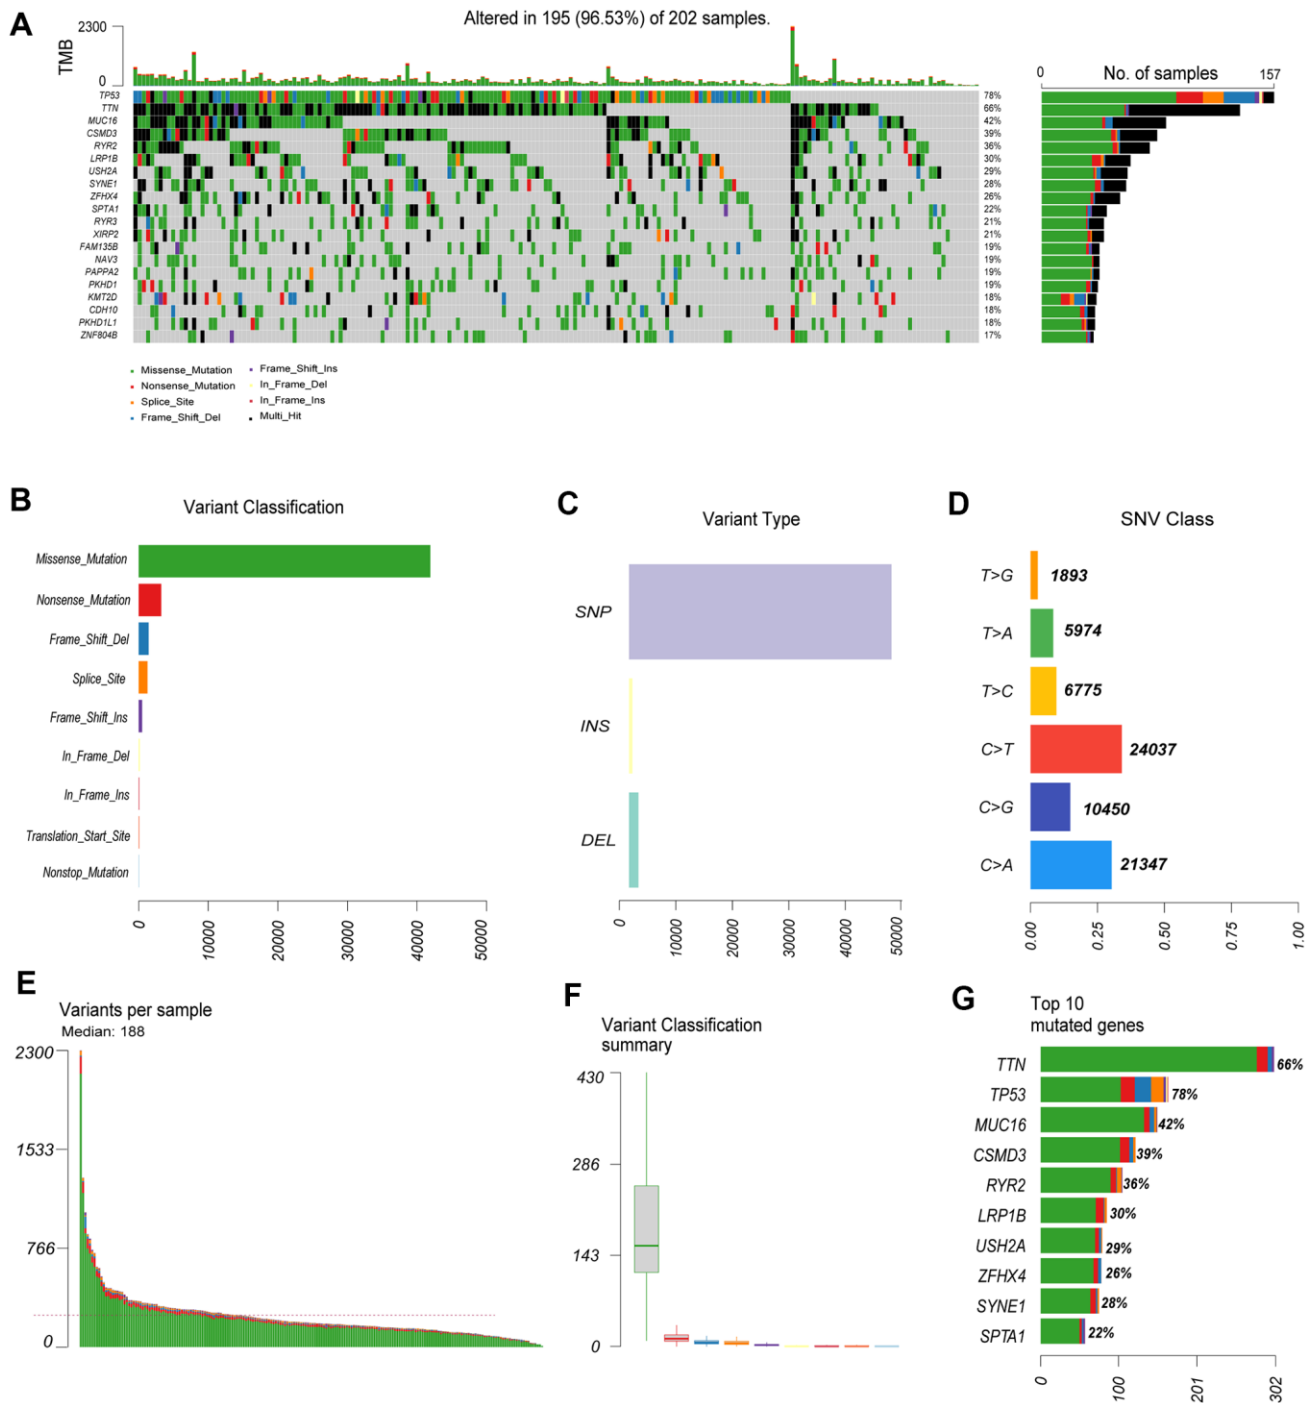

**Supplementary Figure 8. Information on somatic mutations in LUSC patients in the high-risk group.** (A) The waterfall plot shows mutation information for each gene in LUSC patients. Rectangles with different colors represent different mutation types. (B–D) Classification of different mutation types. The most common type of mutation in the summarized figure was a missense mutation. (E) The number of variants in each sample. (F) Box plot. Different colors represent different mutation types. (G) Histograms of the top ten most frequently mutated genes in LUSC.

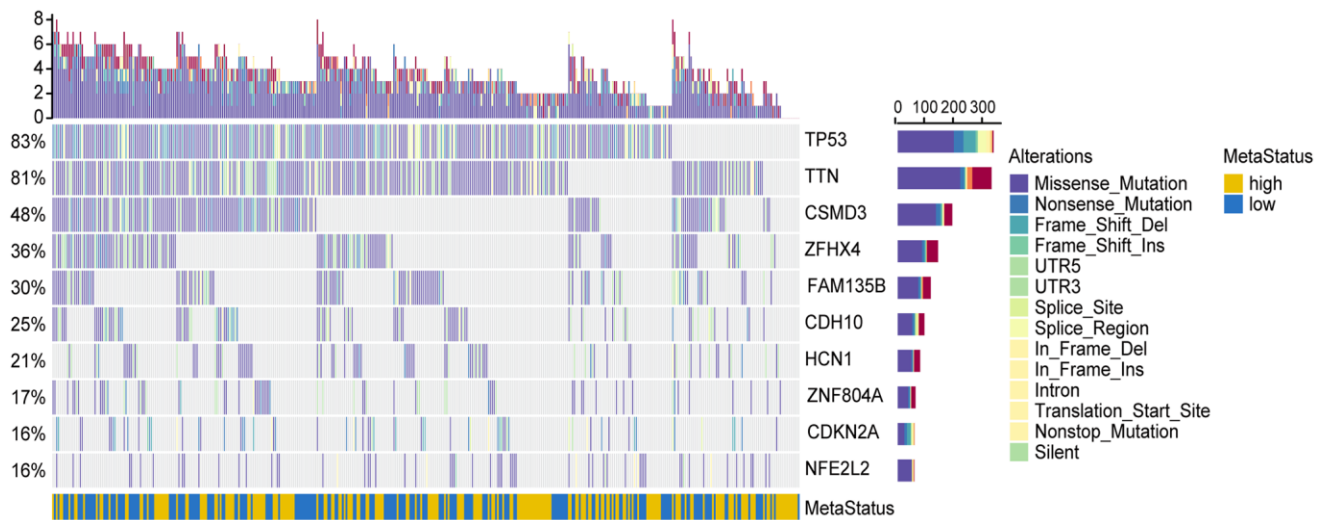

**Supplementary Figure 9. The mutational landscape of SMGs in LUSC patients.** Top: The number of aberrations detected within each sample is shown. Middle: Significantly mutated genes are colored based on the mutation types. Left: The mutation frequency of each gene. Right: The top ten significantly mutated genes, ranked by  $q$ -value according to MutSigCV analysis and the number of mutations per gene. Bottom: High- and low-risk groups.
