# Supplementary material for: Comprehensive analysis of the role of a four-gene signature based on EMT in the prognosis, immunity, and treatment of lung squamous cell carcinoma
Source: publisher site journal article supplement (doi:10.18632/aging.204878), 2023-07-17
Supplement: Supplementary file [file aging-v15i14-204878-supplementary-material-SD2.pdf]

## SUPPLEMENTARY TABLE

Supplementary Table 1. The IC50 of 65 chemotherapy drugs in the high- and low-risk groups of LUSC patients.

| Drug's name        | P.value    |
|--------------------|------------|
| A.443654           | 1.00000000 |
| BIBW2992           | 1.00000000 |
| BI.2536            | 1.00000000 |
| BIRB.0796          | 1.00000000 |
| CCT018159          | 1.00000000 |
| Gefitinib          | 1.00000000 |
| Erlotinib          | 0.99999999 |
| Bosutinib          | 0.99999983 |
| Cisplatin          | 0.99998044 |
| Epothilone.B       | 0.99992999 |
| ATRA               | 0.99791900 |
| Etoposide          | 0.99735393 |
| FH535              | 0.99688335 |
| Doxorubicin        | 0.95712317 |
| BI.D1870           | 0.91972925 |
| Elesclomol         | 0.87438764 |
| EHT.1864           | 0.71950857 |
| Gemcitabine        | 0.64221140 |
| Cyclopamine        | 0.63948724 |
| CGP.082996         | 0.59314005 |
| ABT.888            | 0.38657311 |
| AMG.706            | 0.31067710 |
| ABT.263            | 0.27994608 |
| Docetaxel          | 0.22039561 |
| AKT.inhibitor.VIII | 0.18308981 |
| BAY.61.3606        | 0.14699632 |
| Bleomycin          | 0.13859567 |
| Bexarotene         | 0.09412018 |
| Camptothecin       | 0.08357952 |
| AICAR              | 0.05181055 |
| Bortezomib         | 0.00748255 |
| CCT007093          | 0.00508396 |
| GNF.2              | 0.00198718 |
| AP.24534           | 0.00186805 |
| CMK                | 0.00053376 |
| AZD.0530           | 0.00022121 |
| Cytarabine         | 0.00018178 |
| Axitinib           | 0.00009021 |

|              |            |
|--------------|------------|
| AG.014699    | 0.00008762 |
| AUY922       | 0.00004240 |
| FTI.277      | 0.00003666 |
| AZD7762      | 0.00001216 |
| BMS.708163   | 0.00000894 |
| Embelin      | 0.00000837 |
| AZD8055      | 0.00000038 |
| AZD.2281     | 0.00000019 |
| AZD6244      | 0.00000011 |
| CHIR.99021   | 0.00000000 |
| AZ628        | 0.00000000 |
| CEP.701      | 0.00000000 |
| A.770041     | 0.00000000 |
| AS601245     | 0.00000000 |
| DMOG         | 0.00000000 |
| Bryostatin.1 | 0.00000000 |
| Bicalutamide | 0.00000000 |
| CI.1040      | 0.00000000 |
| BMS.509744   | 0.00000000 |
| CGP.60474    | 0.00000000 |
| BX.795       | 0.00000000 |
| AZD6482      | 0.00000000 |
| Dasatinib    | 0.00000000 |
| BMS.536924   | 0.00000000 |
| BMS.754807   | 0.00000000 |
| GDC.0449     | 0.00000000 |
| GDC0941      | 0.00000000 |

---
